CORRECTION

# Correction: Publication reform to safeguard wildlife from researcher harm

Kate A. Field, Paul C. Paquet, Kyle Artelle, Gilbert Proulx, Ryan K. Brook, Chris T. Darimont

In this work [1], the following sentence within the Introduction was stated incorrectly:

Although recent revisions to the Guide incorporated consultation with wildlife biologists, a recent assessment considered the consultation to have occurred in a “cursory and broad manner” [6].

The original intent of the statement was to indicate that wildlife biology was not addressed in The Guide to the Care and Use of Laboratory Animals until recently, and that reference to wildlife biology occurred in a cursory and broad manner. The statement should be revised as follows:

Although recent revisions to the Guide addressed wildlife biology, a recent assessment considered this to have occurred in a “cursory and broad manner” with no evidence of consultation with wildlife biologists [6].

## Reference

1. Field KA, Paquet PC, Artelle K, Proulx G, Brook RK, Darimont CT (2019) Publication reform to safeguard wildlife from researcher harm. PLoS Biol 17(4): e3000193. <https://doi.org/10.1371/journal.pbio.3000193> PMID: 30973871

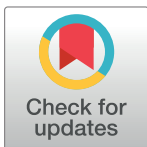

## OPEN ACCESS

**Citation:** Field KA, Paquet PC, Artelle K, Proulx G, Brook RK, Darimont CT (2020) Correction: Publication reform to safeguard wildlife from researcher harm. PLoS Biol 18(5): e3000752. <https://doi.org/10.1371/journal.pbio.3000752>

**Published:** May 18, 2020

**Copyright:** © 2020 Field et al. This is an open access article distributed under the terms of the [Creative Commons Attribution License](https://creativecommons.org/licenses/by/4.0/), which permits unrestricted use, distribution, and reproduction in any medium, provided the original author and source are credited.
